# Supplementary material
Source: PubMed Central journal article supplement (PMC5675085)
Supplement: BTM2-1-207-s001.pdf [file BTM2-1-207-s001.pdf]

**SUPPLEMENTAL INFORMATION**

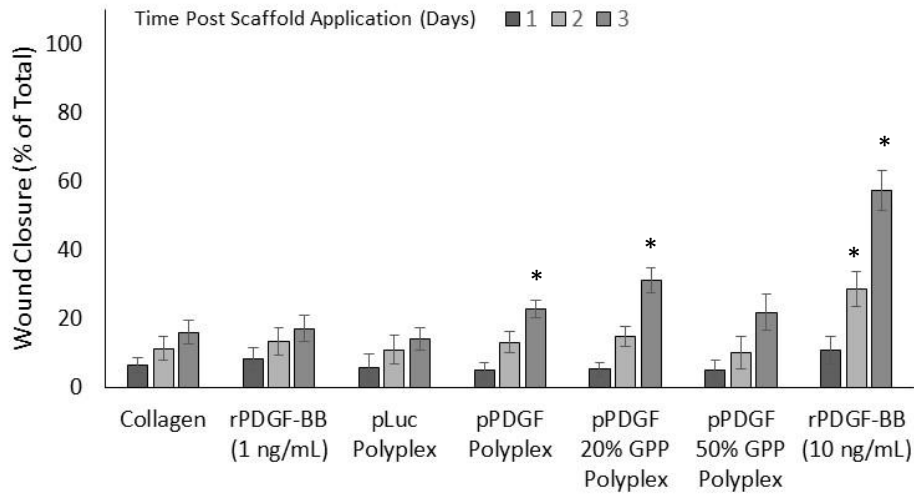

**Figure S1.** *In vitro* wound model wound closure at early time points. To evaluate initial closure, the same defect model was implemented with NIH/3T3 cells pre-labeled with CellTracker™ Deep Red. As previously described, defects in cell-seeded collagen gels were filled with collagen scaffolds modified with rPDGF-BB, polyplex encoding for luciferase, or polyplex encoding for *PDGF-B*, and initial defect invasion was monitored via microscopy. The data represent the mean +/-standard deviation of 3 separately prepared and analyzed samples. \* denotes a statistically-significant difference ( $p < 0.05$ ) relative to the luciferase-encoding controls.

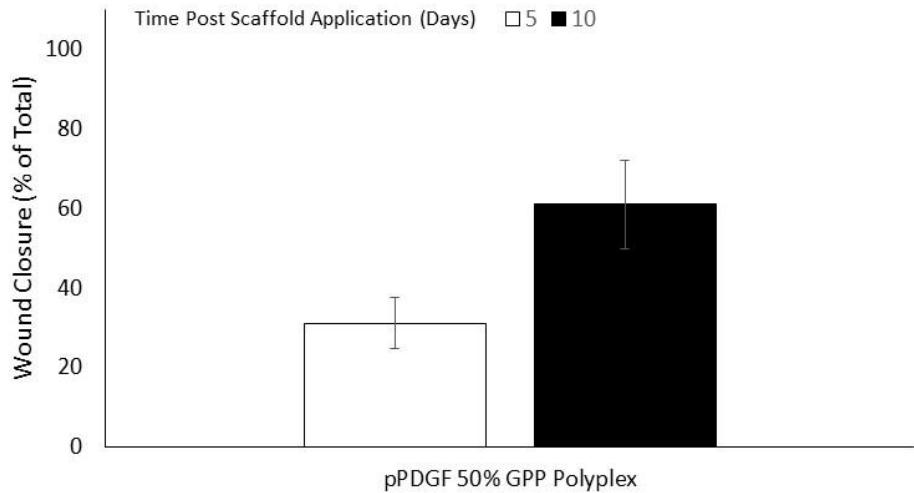

**Figure S2.** *In vitro* wound model. As previously described, defects in cell-seeded collagen gels were filled with collagen scaffolds modified with polyplex encoding for *PDGF-B*. Defect invasion was monitored via microscopy and the effect of GPP-modification was studied. The data represent the mean +/-standard deviation of 2 analyzed samples.
